# Supplementary material
Source: PubMed Central journal article supplement (PMC3948554)

A

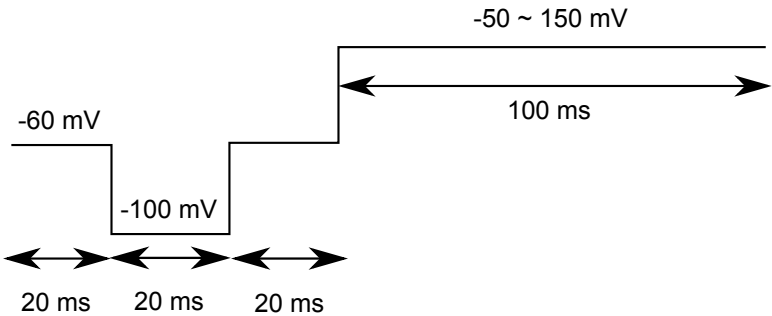

B

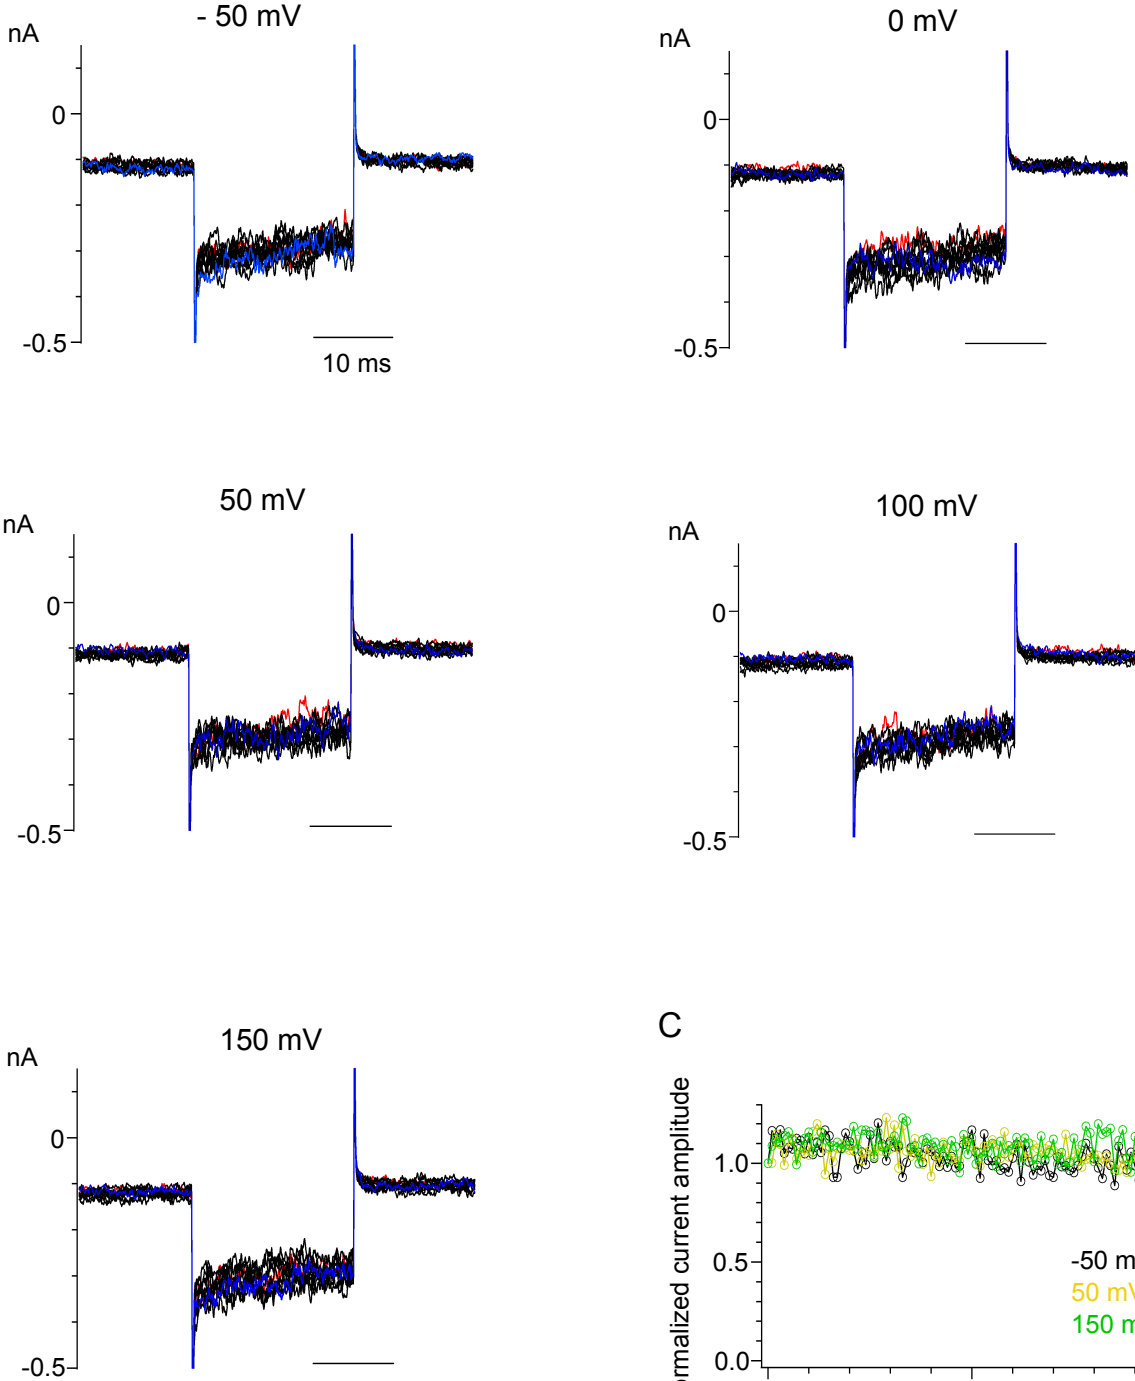

C

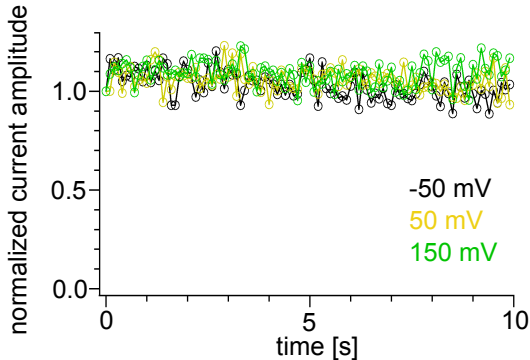

Supplement: tjp0592-0899-sd1.pdf [file tjp0592-0899-sd1.pdf]

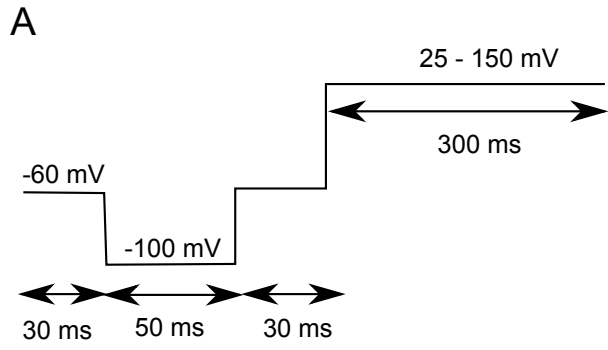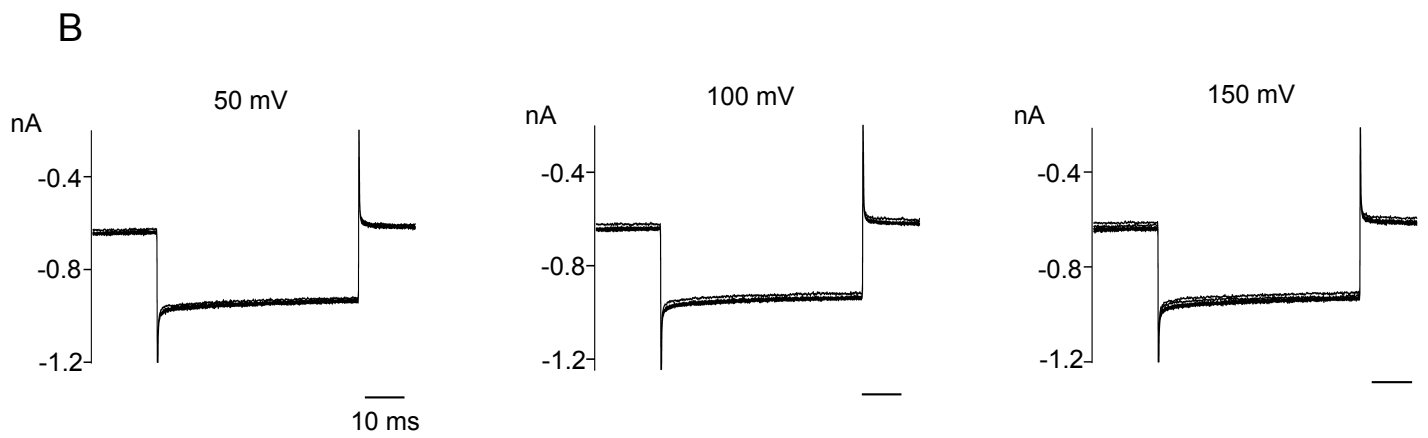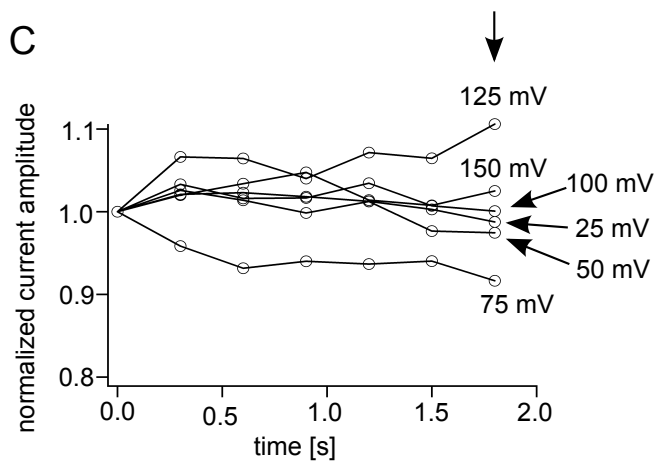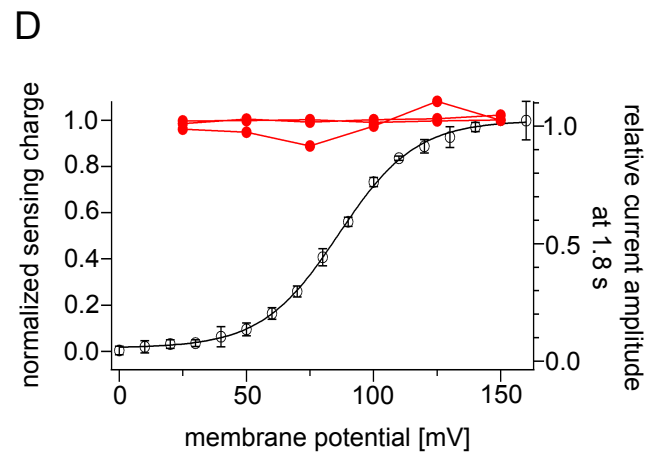

Supplement: tjp0592-0899-sd3.pdf [file tjp0592-0899-sd3.pdf]
